# Supplementary material for: A Comparative Uptake Study of Multiplexed PET Tracers in Mice with Turpentine-Induced Inflammation
Source: Molecules. 2012 Nov 26;17(12):13948–59. doi: 10.3390/molecules171213948 (PMC6268432; doi:10.3390/molecules171213948)
Supplement: Supplementary file 1 [file molecules-17-13948-s001.pdf]

## Supplementary Materials

**Table S1.** Time-uptake ratios of six PET tracers including IM/NM, IM/BL, IM/BR and IM/LI at different time (n = 3 per group, Mean  $\pm$  SD).

| Tissue | Tracers                                 | 5 min            | 15 min           | 30 min          | 45 min          | 60 min           |
|--------|-----------------------------------------|------------------|------------------|-----------------|-----------------|------------------|
| IM/NM  | [ <sup>18</sup> F]-FDG                  | 1.39 $\pm$ 0.23  | 1.74 $\pm$ 0.42  | 2.14 $\pm$ 0.59 | 2.75 $\pm$ 0.67 | 2.81 $\pm$ 0.65  |
|        | <sup>18</sup> F <sup>-</sup>            | 1.11 $\pm$ 0.13  | 1.44 $\pm$ 0.32  | 3.48 $\pm$ 0.88 | 8.74 $\pm$ 1.09 | 10.98 $\pm$ 1.21 |
|        | [ <sup>18</sup> F]-FCH                  | 1.21 $\pm$ 0.25  | 1.46 $\pm$ 0.27  | 1.58 $\pm$ 0.33 | 1.74 $\pm$ 0.38 | 1.83 $\pm$ 0.43  |
|        | [ <sup>11</sup> C]-PIB                  | 0.93 $\pm$ 0.07  | 0.97 $\pm$ 0.09  | 0.98 $\pm$ 0.05 | 1.02 $\pm$ 0.07 | 1.07 $\pm$ 0.11  |
|        | [ <sup>11</sup> C]-DPA-Zn <sup>2+</sup> | 1.02 $\pm$ 0.08  | 1.13 $\pm$ 0.12  | 1.24 $\pm$ 0.15 | 1.44 $\pm$ 0.20 | 1.73 $\pm$ 0.13  |
|        | [ <sup>11</sup> C]-DMCYS                | 1.13 $\pm$ 0.20  | 1.33 $\pm$ 0.13  | 1.45 $\pm$ 0.21 | 1.78 $\pm$ 0.13 | 1.27 $\pm$ 0.09  |
| IM/BL  | [ <sup>18</sup> F]-FDG                  | 0.98 $\pm$ 0.21  | 1.69 $\pm$ 0.32  | 2.31 $\pm$ 0.43 | 2.87 $\pm$ 0.26 | 3.63 $\pm$ 0.51  |
|        | <sup>18</sup> F <sup>-</sup>            | 0.14 $\pm$ 0.01  | 0.31 $\pm$ 0.04  | 2.80 $\pm$ 0.31 | 4.92 $\pm$ 0.51 | 8.17 $\pm$ 0.69  |
|        | [ <sup>18</sup> F]-FCH                  | 5.29 $\pm$ 0.61  | 3.28 $\pm$ 0.43  | 1.73 $\pm$ 0.14 | 1.52 $\pm$ 0.09 | 1.45 $\pm$ 0.12  |
|        | [ <sup>11</sup> C]-PIB                  | 0.86 $\pm$ 0.09  | 0.97 $\pm$ 0.06  | 1.19 $\pm$ 0.10 | 1.38 $\pm$ 0.14 | 1.57 $\pm$ 0.25  |
|        | [ <sup>11</sup> C]-DPA-Zn <sup>2+</sup> | 2.01 $\pm$ 0.36  | 1.32 $\pm$ 0.23  | 1.19 $\pm$ 0.12 | 1.05 $\pm$ 0.11 | 1.24 $\pm$ 0.27  |
|        | [ <sup>11</sup> C]-DMCYS                | 3.68 $\pm$ 0.33  | 2.6 $\pm$ 0.32   | 2.05 $\pm$ 0.24 | 1.58 $\pm$ 0.18 | 0.96 $\pm$ 0.09  |
| IM/BR  | [ <sup>18</sup> F]-FDG                  | 0.32 $\pm$ 0.01  | 0.45 $\pm$ 0.04  | 0.56 $\pm$ 0.07 | 0.69 $\pm$ 0.08 | 0.78 $\pm$ 0.11  |
|        | <sup>18</sup> F <sup>-</sup>            | 14.23 $\pm$ 1.42 | 12.22 $\pm$ 1.09 | 8.32 $\pm$ 0.95 | 7.92 $\pm$ 0.54 | 25.64 $\pm$ 2.58 |
|        | [ <sup>18</sup> F]-FCH                  | 8.32 $\pm$ 0.96  | 7.04 $\pm$ 0.89  | 5.33 $\pm$ 0.64 | 5.30 $\pm$ 0.54 | 5.27 $\pm$ 0.48  |
|        | [ <sup>11</sup> C]-PIB                  | 0.88 $\pm$ 0.11  | 1.00 $\pm$ 0.14  | 1.07 $\pm$ 0.12 | 1.21 $\pm$ 0.23 | 1.32 $\pm$ 0.22  |
|        | [ <sup>11</sup> C]-DPA-Zn <sup>2+</sup> | 1.43 $\pm$ 0.28  | 1.32 $\pm$ 0.20  | 1.27 $\pm$ 0.17 | 1.09 $\pm$ 0.15 | 0.9 $\pm$ 0.06   |
|        | [ <sup>11</sup> C]-DMCYS                | 3.51 $\pm$ 0.38  | 2.33 $\pm$ 0.19  | 1.72 $\pm$ 0.12 | 1.32 $\pm$ 0.11 | 1.11 $\pm$ 0.07  |
| IM/LI  | [ <sup>18</sup> F]-FDG                  | 0.12 $\pm$ 0.01  | 0.97 $\pm$ 0.10  | 1.28 $\pm$ 0.13 | 1.96 $\pm$ 0.21 | 2.12 $\pm$ 0.27  |
|        | <sup>18</sup> F <sup>-</sup>            | 0.89 $\pm$ 0.04  | 1.40 $\pm$ 0.21  | 2.77 $\pm$ 0.28 | 7.62 $\pm$ 0.62 | 12.76 $\pm$ 1.10 |
|        | [ <sup>18</sup> F]-FCH                  | 0.12 $\pm$ 0.02  | 0.07 $\pm$ 0.01  | 0.08 $\pm$ 0.01 | 0.08 $\pm$ 0.01 | 0.08 $\pm$ 0.01  |
|        | [ <sup>11</sup> C]-PIB                  | 0.70 $\pm$ 0.10  | 0.72 $\pm$ 0.08  | 0.80 $\pm$ 0.11 | 0.87 $\pm$ 0.13 | 0.91 $\pm$ 0.09  |
|        | [ <sup>11</sup> C]-DPA-Zn <sup>2+</sup> | 0.86 $\pm$ 0.11  | 0.73 $\pm$ 0.08  | 0.54 $\pm$ 0.06 | 0.38 $\pm$ 0.02 | 0.26 $\pm$ 0.03  |
|        | [ <sup>11</sup> C]-DMCYS                | 0.13 $\pm$ 0.01  | 0.56 $\pm$ 0.13  | 1.24 $\pm$ 0.22 | 1.65 $\pm$ 0.27 | 1.42 $\pm$ 0.28  |

Note: IM refers to inflammatory thigh muscle; NM refers to normal uninflammatory thigh muscle; BL refers to blood; BR refers to brain; and LI refers to liver.

Because [<sup>18</sup>F]FCH and [<sup>11</sup>C]DMCYS showed lower accumulation in inflammatory tissue than [<sup>18</sup>F]FDG, we compared the target-to-nontarget ratios of [<sup>18</sup>F]FDG, [<sup>18</sup>F]FCH, [<sup>11</sup>C]DMCYS in the S180 fibrosarcoma-bearing and inflammatory mice (in the same animals) at 60 min after injection of the tracers (%ID/g, n = 3 per group), as shown in Supplemental Table 2.

**Table S2.** The target-to-nontarget ratios of [<sup>18</sup>F]FDG, [<sup>18</sup>F]FCH, [<sup>11</sup>C]DMCYS in S180 fibrosarcoma-bearing and inflammatory mice at 60 min after injection (%ID/g, n = 3 per group, Mean  $\pm$  SD).

| Tissue             | [ <sup>18</sup> F]FDG | [ <sup>18</sup> F]FCH | [ <sup>11</sup> C]DMCYS |
|--------------------|-----------------------|-----------------------|-------------------------|
| IM/NM <sup>a</sup> | 2.93 $\pm$ 0.31       | 1.83 $\pm$ 0.51       | 1.32 $\pm$ 0.25         |
| T/NM <sup>b</sup>  | 5.60 $\pm$ 2.82       | 4.52 $\pm$ 1.68       | 8.43 $\pm$ 1.23         |

Notes: <sup>a</sup> The uptake ratio of radioactivity for inflammation to normal muscle; <sup>b</sup> The uptake ratio of radioactivity for tumor to normal muscle.

### ***In Vitro* Stability**

Two samples of [ $^{11}\text{C}$ ]DPA- $\text{Zn}^{2+}$  and [ $^{11}\text{C}$ ]DMCYS (1.48 MBq, 20  $\mu\text{L}$  respectively) dissolved in normal saline were added to 200  $\mu\text{L}$  of mice serum and incubated at 37 °C. A respective aliquot of the serum sample (20  $\mu\text{L}$ ) was injected into an HPLC column at 1 h to analyze their stability in mice serum. The experiment was performed using three separate samples for each tracer, respectively. According to the HPLC analysis, [ $^{11}\text{C}$ ]DPA- $\text{Zn}^{2+}$  and [ $^{11}\text{C}$ ]DMCYS were proved to be stable *in vitro* and no degradation of the tracers was observed in mice serum at 37 °C for 1 h.

### ***In Vivo* Stability**

Two female normal Kunming mice were anesthetized with 10% chloral hydrate solution (3 mL/kg) and injected with a dose of approximately 10.0 MBq (270  $\mu\text{Ci}$ ) of [ $^{11}\text{C}$ ]DPA- $\text{Zn}^{2+}$  and [ $^{11}\text{C}$ ]DMCYS, respectively, in 200  $\mu\text{L}$  of normal saline via the tail vein. The mice were sacrificed at 20 min (for  $^{11}\text{C}$  labeled compounds) after injection, and then the respective urine was carefully collected and filtered through a 0.22  $\mu\text{m}$  Millipore filter into a tube. Respective aliquots of the urine sample (20  $\mu\text{L}$ ) were injected into an HPLC column to analyze the *in vivo* stability in the mice. Blood was obtained through the eyeball and centrifuged (6,000 rpm, 4 min), then filtered through a 0.22  $\mu\text{m}$  Millipore filter to analyze by HPLC. In the *in vivo* stability, the radioactivities were approximately 20% of [ $^{11}\text{C}$ ]DMCYS and 80% of its metabolic product in urine and most metabolites of [ $^{11}\text{C}$ ]DMCYS existed in blood 20 min after injection. However, [ $^{11}\text{C}$ ]DPA- $\text{Zn}^{2+}$  was stable *in vivo* and no metabolites were found in urine or blood.
